# Supplementary material
Source: ML conference proceedings conference paper supplement (https://openreview.net/forum?id=MVDzIreiRqW)
Supplement: supplementary_material [file attachment]

## Appendix

### A Kernel evolution and performance graphs for $\varepsilon = 8/255$

We show the kernel evolution and performance graphs for  $\varepsilon = 8/255$  for CIFAR-10 and CIFAR-100 here.

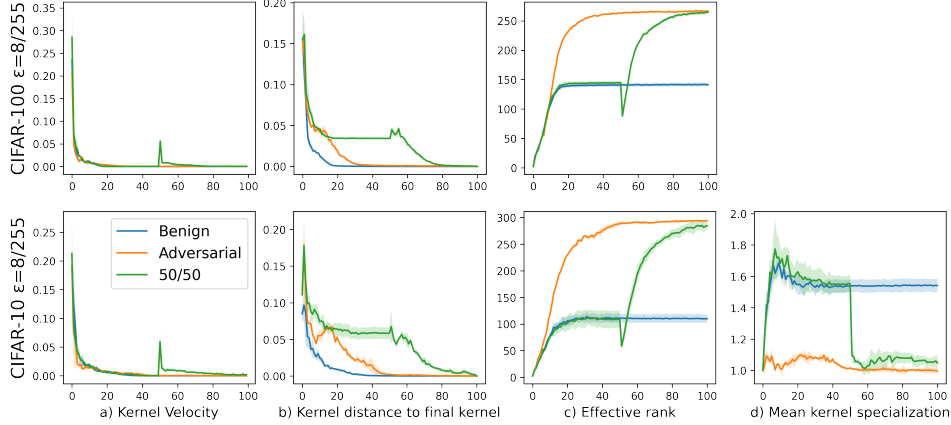

Figure 6: Evolution of the Neural Tangent Kernel under benign and adversarial training on Resnet-18s on CIFAR-100 (top) and CIFAR-10 (bottom) with a larger attack radius of  $\varepsilon = 8/255$ .

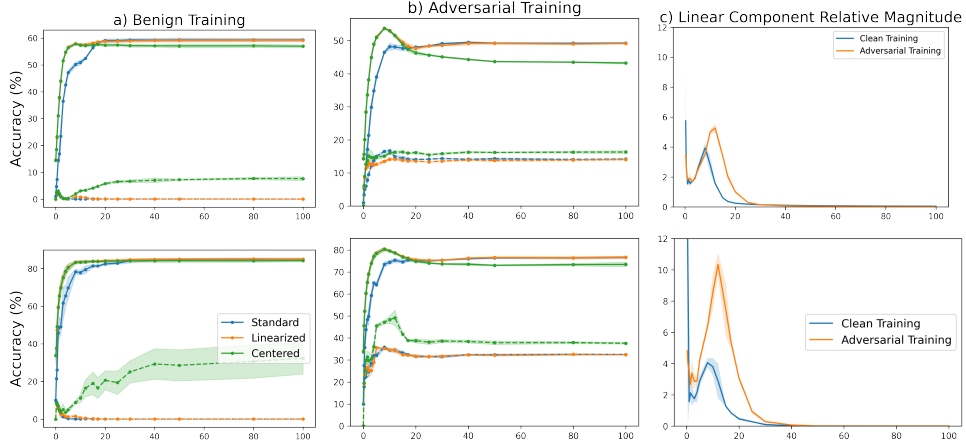

Figure 7: Performance of standard, linearized and centered training based on kernels made from benign or standard training on CIFAR-100 (top) and CIFAR-10 (bottom) with  $\varepsilon = 8/255$ .

### B Experiment Details

All experiments, unless otherwise stated are taken over  $n = 3$  runs with standard deviations reported.

**Libraries and Hardware** Experiments are run in JAX [11] and additionally used the neural tangents library [57] for computation of neural tangent kernels. Experiments were run on either a Tesla V100, Nvidia RTX A6000s or Nvidia Titan RTX.

**Network Architecture.** For all experiments we use the Resnet-18 V1 implementation in the Haiku python package [33], with an initial convolutional layer configuration of  $3 \times 3$  kernels with stride 1. Additionally, we remove the initial pooling layer, as we are dealing with relatively small  $32 \times 32$  sized images.

**Network Training** For stage 1 training, we used SGD optimizer with a learning rate of 0.1 and momentum of 0.9. It was found that the results were not sensitive to the learning rate. For stage

2 training, we use the SGD optimizer with a learning rate of 0.01 and a momentum of 0.9 for linearized/centered training, and a learning rate of 0.01 or 0.0001 (stated in the text) with a momentum of 0.9 for stage two training with SGD.

**Adversarial training and attack configuration** At test time we calculate perform iterated  $L_\infty$  PGD attacks with  $\varepsilon = \frac{4}{255}$  for  $n = 100$  iterations, with  $\alpha = \frac{2\varepsilon}{n}$ . Additionally, we initialize each adversarial example by first randomly sampling from within an  $\varepsilon L_\infty$  ball around the training samples. During training, we use the sample value of  $\varepsilon$ , but with  $n = 20$  inner iterations, with  $\alpha = \frac{2\varepsilon}{n}$ . We clip adversarial images to be between 0 and 1.

**Estimated Time taken** We did not collect data on the experiment runtime, but in practice we found that benign training for 100 epochs with standard dynamics took around 1 hour on a Tesla V100. Adversarial training takes around 10 hours on the same configuration. Linearized/centered training takes around twice as long as standard dynamics training.

**Kernel Calculation** For each of the  $n = 3$  random seeds, we choose a different subset of 500 class-balanced samples from CIFAR-10/100 to calculate the NTK kernel matrix. We did not choose a larger number as computing the kernel matrix on large dataset scales quadratically with dataset size and is by far the slowest part of these experiments.

**NTK Visualization** During maximization or minimization of the cosine similarity, we initialize images as grey images, and perform 600 iterations of  $L_\infty$  PGD with  $\alpha = 0.001$ . We found that other distance metrics such as a the euclidean distance did not results in similar looking images.

## C More SGD vs Linearized Dynamics Results

We repeat the experiment in section 6 with the spawn epochs of  $t = 100$  and for CIFAR-100 and for  $t = 10, 100$  for CIFAR-10 and CIFAR-100 for  $\varepsilon = 8$ .

Table 3: Performance of stage 2 network training with a parent network trained with adversarial training for 100 epochs on CIFAR-10.  $\eta$  = learning rates. (n=3). \* - We observe an outlier which had 66.3% robust accuracy and a kernel distance of 0.177. We exclude this result for the numbers presented in the table.

|                      | Parent Network   | Frozen Batchnorm |                        |                      | Standard Batchnorm  |                        |                      |
|----------------------|------------------|------------------|------------------------|----------------------|---------------------|------------------------|----------------------|
|                      |                  | Centering        | SGD<br>$\eta = 0.0001$ | SGD<br>$\eta = 0.01$ | Centering           | SGD<br>$\eta = 0.0001$ | SGD<br>$\eta = 0.01$ |
| Benign Accuracy      | 81.58 $\pm$ 0.63 | 79.65 $\pm$ 0.30 | 81.78 $\pm$ 0.65       | 80.44 $\pm$ 0.78     | 79.81 $\pm$ 0.79    | 80.05 $\pm$ 0.93       | 80.59 $\pm$ 0.84     |
| Adversarial Accuracy | 51.77 $\pm$ 0.80 | 55.46 $\pm$ 1.79 | 46.66 $\pm$ 1.29       | 47.55 $\pm$ 0.52*    | 51.40 $\pm$ 0.16    | 46.27 $\pm$ 1.46       | 46.37 $\pm$ 1.17     |
| Kernel Distance      | -                | 0 $\pm$ 0        | 0.0021 $\pm$ 0.0004    | 0.0076 $\pm$ 0.0014* | 0.0001 $\pm$ 0.0000 | 0.0014 $\pm$ 0.0003    | 0.0028 $\pm$ 0.0006  |

Table 4: Performance of stage 2 network training with a parent network trained with adversarial training for 10 epochs on CIFAR-100.  $\eta$  = learning rates. (n=3)

|                      | Parent Network   | Frozen Batchnorm |                        |                      | Standard Batchnorm  |                        |                      |
|----------------------|------------------|------------------|------------------------|----------------------|---------------------|------------------------|----------------------|
|                      |                  | Centering        | SGD<br>$\eta = 0.0001$ | SGD<br>$\eta = 0.01$ | Centering           | SGD<br>$\eta = 0.0001$ | SGD<br>$\eta = 0.01$ |
| Benign Accuracy      | 51.46 $\pm$ 0.76 | 55.50 $\pm$ 0.25 | 56.59 $\pm$ 0.12       | 56.08 $\pm$ 0.22     | 23.31 $\pm$ 3.68    | 41.02 $\pm$ 2.34       | 21.96 $\pm$ 3.38     |
| Adversarial Accuracy | 23.49 $\pm$ 0.59 | 26.62 $\pm$ 0.40 | 20.19 $\pm$ 0.40       | 20.13 $\pm$ 0.30     | 13.92 $\pm$ 2.53    | 10.74 $\pm$ 1.01       | 3.30 $\pm$ 0.37      |
| Kernel Distance      | -                | 0 $\pm$ 0        | 0.0071 $\pm$ 0.0017    | 0.0135 $\pm$ 0.0023  | 0.0017 $\pm$ 0.0012 | 0.0160 $\pm$ 0.0018    | 0.0432 $\pm$ 0.0034  |

Table 5: Performance of stage 2 network training with a parent network trained with adversarial training for 100 epochs on CIFAR-100.  $\eta$  = learning rates. (n=3)

|                      | Parent Network   | Frozen Batchnorm |                        |                      | Standard Batchnorm  |                        |                      |
|----------------------|------------------|------------------|------------------------|----------------------|---------------------|------------------------|----------------------|
|                      |                  | Centering        | SGD<br>$\eta = 0.0001$ | SGD<br>$\eta = 0.01$ | Centering           | SGD<br>$\eta = 0.0001$ | SGD<br>$\eta = 0.01$ |
| Benign Accuracy      | 55.02 $\pm$ 0.18 | 50.24 $\pm$ 0.26 | 53.28 $\pm$ 0.12       | 53.89 $\pm$ 0.18     | 47.99 $\pm$ 0.33    | 50.10 $\pm$ 0.64       | 49.15 $\pm$ 0.90     |
| Adversarial Accuracy | 24.42 $\pm$ 0.14 | 26.86 $\pm$ 0.59 | 18.51 $\pm$ 0.28       | 20.51 $\pm$ 0.28     | 21.47 $\pm$ 0.50    | 15.34 $\pm$ 0.29       | 14.50 $\pm$ 0.38     |
| Kernel Distance      | -                | 0 $\pm$ 0        | 0.0039 $\pm$ 0.0003    | 0.0052 $\pm$ 0.0006  | 0.0001 $\pm$ 0.0000 | 0.0010 $\pm$ 0.0002    | 0.0019 $\pm$ 0.0003  |

Table 6: Performance of stage 2 network training with a parent network trained with adversarial training for 10 epochs on CIFAR-10 with  $\varepsilon = 8/255$ .  $\eta =$  learning rates. (n=3)

|                      | Frozen Batchnorm |                  |                        |                      | Standard Batchnorm  |                        |                      |
|----------------------|------------------|------------------|------------------------|----------------------|---------------------|------------------------|----------------------|
|                      | Parent Network   | Centering        | SGD<br>$\eta = 0.0001$ | SGD<br>$\eta = 0.01$ | Centering           | SGD<br>$\eta = 0.0001$ | SGD<br>$\eta = 0.01$ |
| Benign Accuracy      | 74.42 $\pm$ 0.93 | 79.57 $\pm$ 0.50 | 80.76 $\pm$ 0.38       | 80.29 $\pm$ 0.54     | 16.25 $\pm$ 8.52    | 25.93 $\pm$ 7.36       | 19.34 $\pm$ 4.74     |
| Adversarial Accuracy | 34.49 $\pm$ 0.68 | 48.31 $\pm$ 1.71 | 22.79 $\pm$ 0.41       | 24.50 $\pm$ 0.48     | 5.88 $\pm$ 4.08     | 1.70 $\pm$ 0.46        | 1.26 $\pm$ 0.32      |
| Kernel Accuracy      | -                | 0 $\pm$ 0        | 0.0164 $\pm$ 0.0035    | 0.0283 $\pm$ 0.0040  | 0.0024 $\pm$ 0.0011 | 0.0289 $\pm$ 0.0050    | 0.0750 $\pm$ 0.0113  |

Table 7: Performance of stage 2 network training with a parent network trained with adversarial training for 100 epochs on CIFAR-10 with  $\varepsilon = 8/255$ .  $\eta =$  learning rates. (n=3)

|                      | Frozen Batchnorm |                  |                        |                      | Standard Batchnorm  |                        |                      |
|----------------------|------------------|------------------|------------------------|----------------------|---------------------|------------------------|----------------------|
|                      | Parent Network   | Centering        | SGD<br>$\eta = 0.0001$ | SGD<br>$\eta = 0.01$ | Centering           | SGD<br>$\eta = 0.0001$ | SGD<br>$\eta = 0.01$ |
| Benign Accuracy      | 76.64 $\pm$ 0.52 | 73.42 $\pm$ 1.03 | 76.78 $\pm$ 0.57       | 76.11 $\pm$ 0.37     | 74.80 $\pm$ 1.20    | 74.68 $\pm$ 1.84       | 75.17 $\pm$ 1.54     |
| Adversarial Accuracy | 32.52 $\pm$ 0.14 | 37.61 $\pm$ 0.38 | 27.38 $\pm$ 0.40       | 27.79 $\pm$ 0.35     | 35.74 $\pm$ 0.45    | 27.92 $\pm$ 2.33       | 27.55 $\pm$ 1.81     |
| Kernel Accuracy      | -                | 0 $\pm$ 0        | 0.0024 $\pm$ 0.0003    | 0.0094 $\pm$ 0.0006  | 0.0001 $\pm$ 0.0000 | 0.0019 $\pm$ 0.0002    | 0.0033 $\pm$ 0.0004  |

Table 8: Performance of stage 2 network training with a parent network trained with adversarial training for 10 epochs on CIFAR-100 with  $\varepsilon = 8/255$ .  $\eta =$  learning rates. (n=3)

|                      | Frozen Batchnorm |                  |                        |                      | Standard Batchnorm  |                        |                      |
|----------------------|------------------|------------------|------------------------|----------------------|---------------------|------------------------|----------------------|
|                      | Parent Network   | Centering        | SGD<br>$\eta = 0.0001$ | SGD<br>$\eta = 0.01$ | Centering           | SGD<br>$\eta = 0.0001$ | SGD<br>$\eta = 0.01$ |
| Benign Accuracy      | 48.19 $\pm$ 1.08 | 52.97 $\pm$ 0.34 | 54.80 $\pm$ 0.55       | 53.43 $\pm$ 0.43     | 8.01 $\pm$ 0.67     | 30.08 $\pm$ 0.73       | 10.09 $\pm$ 0.85     |
| Adversarial Accuracy | 16.73 $\pm$ 0.26 | 16.06 $\pm$ 0.33 | 10.10 $\pm$ 0.07       | 12.22 $\pm$ 0.19     | 4.45 $\pm$ 0.67     | 2.89 $\pm$ 0.57        | 0.40 $\pm$ 0.11      |
| Kernel Accuracy      | -                | 0 $\pm$ 0        | 0.0074 $\pm$ 0.0008    | 0.0145 $\pm$ 0.0010  | 0.0005 $\pm$ 0.0001 | 0.0251 $\pm$ 0.0037    | 0.0714 $\pm$ 0.0074  |

Table 9: Performance of stage 2 network training with a parent network trained with adversarial training for 100 epochs on CIFAR-100 with  $\varepsilon = 8/255$ .  $\eta =$  learning rates. (n=3)

|                      | Frozen Batchnorm |                  |                        |                      | Standard Batchnorm  |                        |                      |
|----------------------|------------------|------------------|------------------------|----------------------|---------------------|------------------------|----------------------|
|                      | Parent Network   | Centering        | SGD<br>$\eta = 0.0001$ | SGD<br>$\eta = 0.01$ | Centering           | SGD<br>$\eta = 0.0001$ | SGD<br>$\eta = 0.01$ |
| Benign Accuracy      | 49.26 $\pm$ 0.18 | 43.23 $\pm$ 0.28 | 47.08 $\pm$ 0.19       | 48.21 $\pm$ 0.17     | 42.63 $\pm$ 0.68    | 45.55 $\pm$ 0.71       | 45.50 $\pm$ 0.72     |
| Adversarial Accuracy | 14.21 $\pm$ 0.12 | 16.32 $\pm$ 0.41 | 9.17 $\pm$ 0.19        | 10.73 $\pm$ 0.14     | 13.11 $\pm$ 0.44    | 7.13 $\pm$ 0.28        | 6.73 $\pm$ 0.20      |
| Kernel Accuracy      | -                | 0 $\pm$ 0        | 0.0043 $\pm$ 0.0001    | 0.0057 $\pm$ 0.0004  | 0.0001 $\pm$ 0.0000 | 0.0012 $\pm$ 0.0001    | 0.0019 $\pm$ 0.0001  |

## D Fixed Kernel Adversarial results on CIFAR-100

We report the results of the experiment conducted in section 7 on CIFAR-100 in table 10 and for  $\varepsilon = 8/255$  in table 11 and table 12 for CIFAR-10 and CIFAR-100, respectively. The conclusions made on CIFAR-10 apply to CIFAR-100 and for  $\varepsilon = 8/255$ , with the initial NTK failing to learn, the adversarial kernel seeing a marginal improvement, and the standard kernel seeing a dramatic one.

| Base Kernel                                    | Benign           |                      | Adversarial      |                      |
|------------------------------------------------|------------------|----------------------|------------------|----------------------|
|                                                | Benign Accuracy  | Adversarial Accuracy | Benign Accuracy  | Adversarial Accuracy |
| Standard Adversarial Training (SGD, No Kernel) | 55.02 $\pm$ 0.18 | 24.42 $\pm$ 0.14     | -                | -                    |
| Initialization Kernel $K_{t=0}$                | 14.57 $\pm$ 0.45 | 0.00 $\pm$ 0.00      | 2.09 $\pm$ 0.45  | 0.60 $\pm$ 0.34      |
| Benign Training $K_{t=100, \text{benign}}$     | 57.28 $\pm$ 0.09 | 14.16 $\pm$ 1.03     | 58.01 $\pm$ 0.13 | 32.83 $\pm$ 1.00     |
| Adversarial Training $K_{t=100, \text{adv}}$   | 50.24 $\pm$ 0.26 | 26.86 $\pm$ 0.59     | 53.01 $\pm$ 0.09 | 27.35 $\pm$ 0.41     |

Table 10: Performance of centered networks with either benign or adversarial training performed in stage 2 on CIFAR-100. We choose the base kernel as either the initial NTK, the NTK after 100 epochs of benign training, or 100 epochs of adversarial training.

| Base Kernel                                    | Benign           |                      | Adversarial      |                      |
|------------------------------------------------|------------------|----------------------|------------------|----------------------|
|                                                | Benign Accuracy  | Adversarial Accuracy | Benign Accuracy  | Adversarial Accuracy |
| Standard Adversarial Training (SGD, No Kernel) |                  |                      | -                | -                    |
| Initialization Kernel $K_{t=0}$                | $33.72 \pm 1.58$ | $0.00 \pm 0.00$      | $11.80 \pm 0.20$ | $1.56 \pm 1.91$      |
| Benign Training $K_{t=100, \text{benign}}$     | $84.22 \pm 0.56$ | $32.29 \pm 8.36$     | $79.08 \pm 1.70$ | $51.86 \pm 3.14$     |
| Adversarial Training $K_{t=100, \text{adv}}$   | $73.42 \pm 1.03$ | $37.61 \pm 0.38$     | $76.18 \pm 0.40$ | $41.39 \pm 0.81$     |

Table 11: Performance of centered networks with either benign or adversarial training performed in stage 2 on CIFAR-10 with  $\varepsilon = 8/255$ . We choose the base kernel as either the initial NTK, the NTK after 100 epochs of benign training, or 100 epochs of adversarial training.

| Base Kernel                                    | Benign           |                      | Adversarial      |                      |
|------------------------------------------------|------------------|----------------------|------------------|----------------------|
|                                                | Benign Accuracy  | Adversarial Accuracy | Benign Accuracy  | Adversarial Accuracy |
| Standard Adversarial Training (SGD, No Kernel) |                  |                      | -                | -                    |
| Initialization Kernel $K_{t=0}$                | $14.42 \pm 0.44$ | $0.00 \pm 0.00$      | $1.66 \pm 0.45$  | $0.86 \pm 0.51$      |
| Benign Training $K_{t=100, \text{benign}}$     | $56.96 \pm 0.54$ | $7.66 \pm 0.72$      | $53.14 \pm 2.10$ | $23.42 \pm 2.80$     |
| Adversarial Training $K_{t=100, \text{adv}}$   | $43.23 \pm 0.28$ | $16.32 \pm 0.41$     | $47.27 \pm 0.34$ | $16.91 \pm 0.38$     |

Table 12: Performance of centered networks with either benign or adversarial training performed in stage 2 on CIFAR-100 with  $\varepsilon = 8/255$ . We choose the base kernel as either the initial NTK, the NTK after 100 epochs of benign training, or 100 epochs of adversarial training.

## E Interesting behavior of Centered networks with PGD adversaries

In section 5 we noted that adversarial examples generated on centered training do not fully transfer to networks trained with standard dynamics. In contrast, we found that adversarial examples generated with networks with standard dynamics fool centered networks *better* than the centered network itself. To get this result, we repeated the same experiment in section 5, except we use a centered network on the final standard training kernel as the target network. We show the results on CIFAR-10 and CIFAR-100 in fig. 8. Equally surprising is that adversarial examples generated on centered networks based on kernels early in training fool kernels later in training with  $> 1$  adversarial transferability.

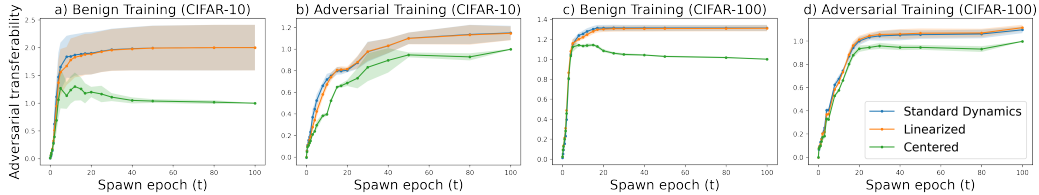

Figure 8: Adversarial transferability of standard, linearized and centered networks to centered networks with either the benign or adversarial kernel on CIFAR-10 and CIFAR-100.

This result suggests that centered networks are more resistant to PGD adversaries. As we only studied PGD adversaries in this paper as opposed to certified robustness attacks, we can only comment on the empirical robustness of centered networks in this paper. We are unsure about the cause of this behavior, and leave it to future work to investigate the unexpected robustness of centered networks to PGD attacks.



## F Visualizations of Adversarial Examples

Here we collect sets of adversarial examples made from networks trained with centered or standard dynamics, we include the following sets of adversarial examples based on the first 100 test images of CIFAR-10:

1. The original test images on CIFAR-10
2. Centered training on the initial NTK
3. Benign training with standard dynamics
4. Benign training in stage 1 followed by centered training
5. Benign training in stage 1 followed by centered adversarial training
6. Adversarial training in stage 1 followed by centered training
7. Adversarial training in stage 1 followed by centered training
8. Adversarial training in stage 1 followed by centered adversarial training

Here, to make the adversarial examples more pronounced, we use  $\varepsilon = 0.3$ . We note a small visual difference between adversarial examples made from networks with standard dynamics and those made with centered dynamics. We observe that adversarial training adversarial examples look more interpretable, and that linearized/centered models based on the benign training kernel contain strange block-spiral artifacts. We also notice that the adversarial images made by standard benign training or centered training on the initial NTK appear to contain more noise artifacts.

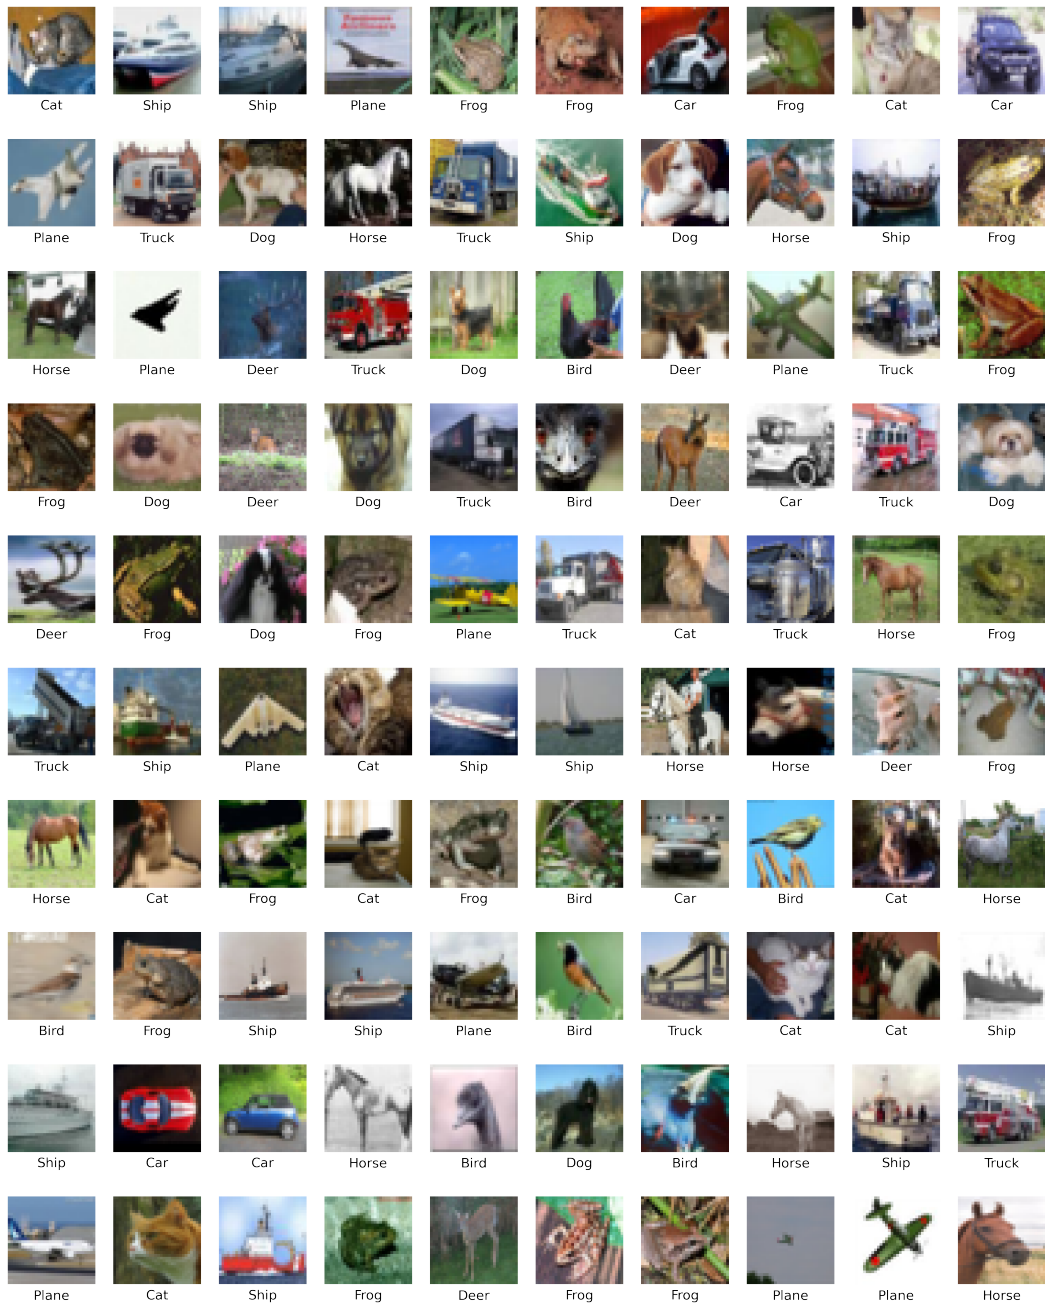

Figure 9: Unmodified CIFAR-10 test images

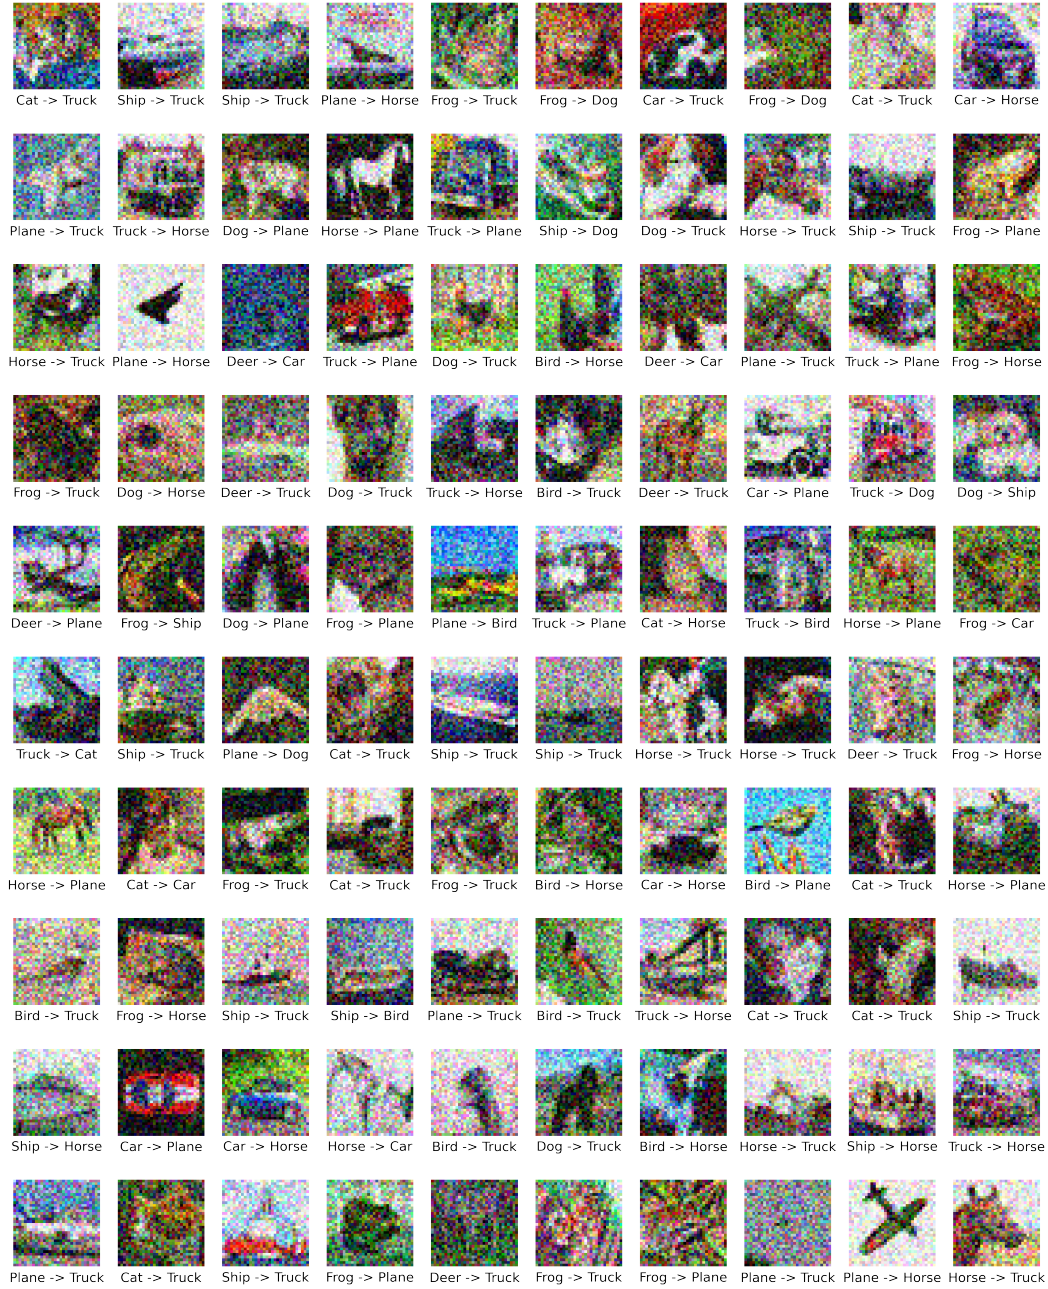

Figure 10: Adversarial examples generated by a centered network on the initial NTK. Adversarial examples look like random noise added to base images.

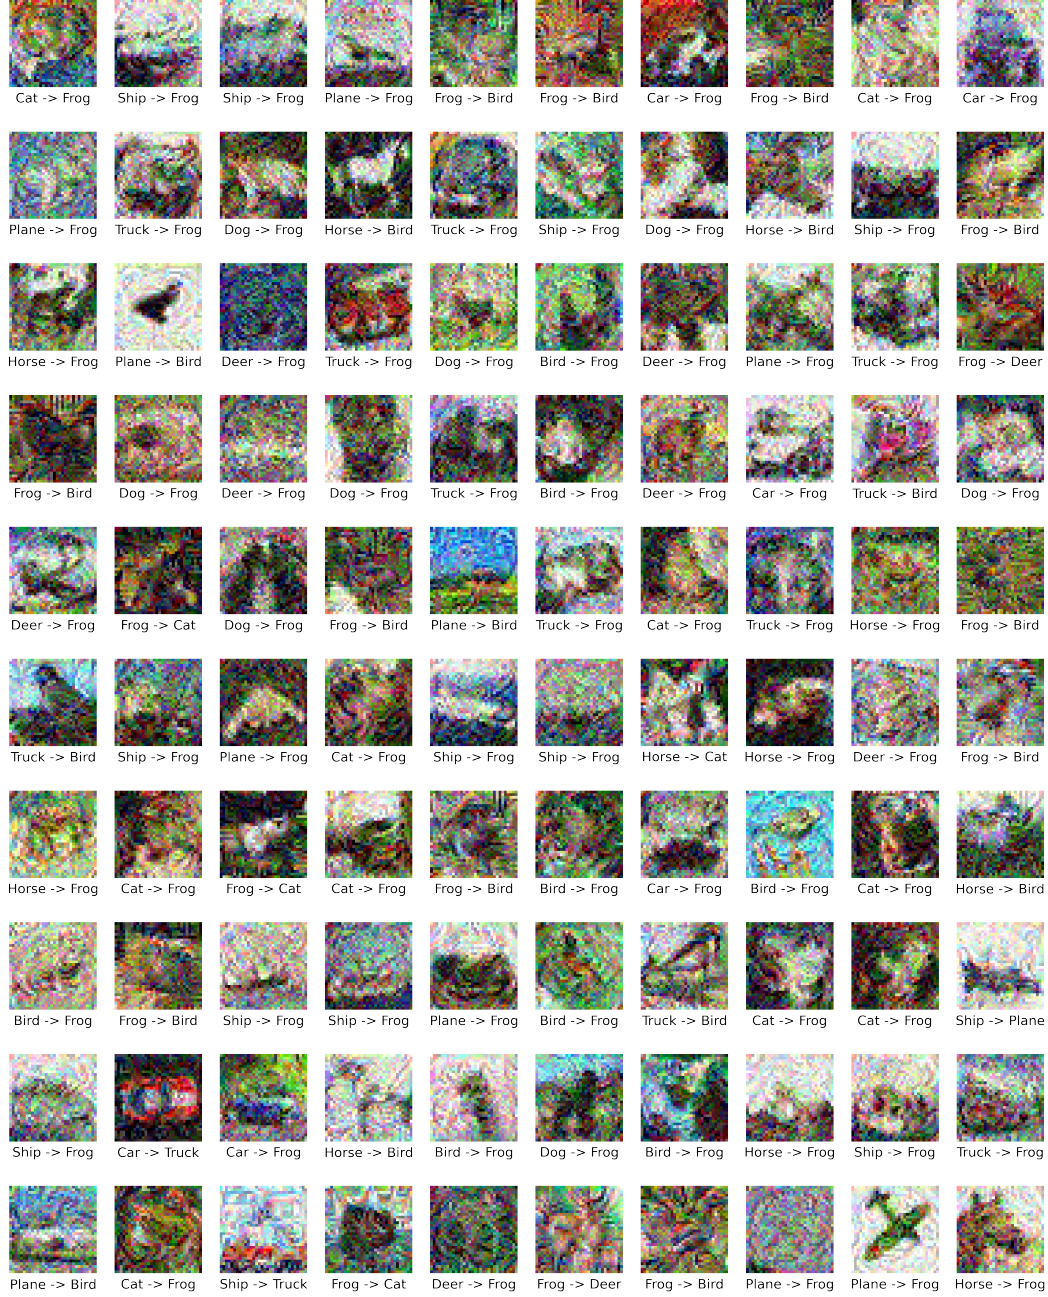

Figure 11: Adversarial examples generated by a network trained with benign training with standard dynamics.



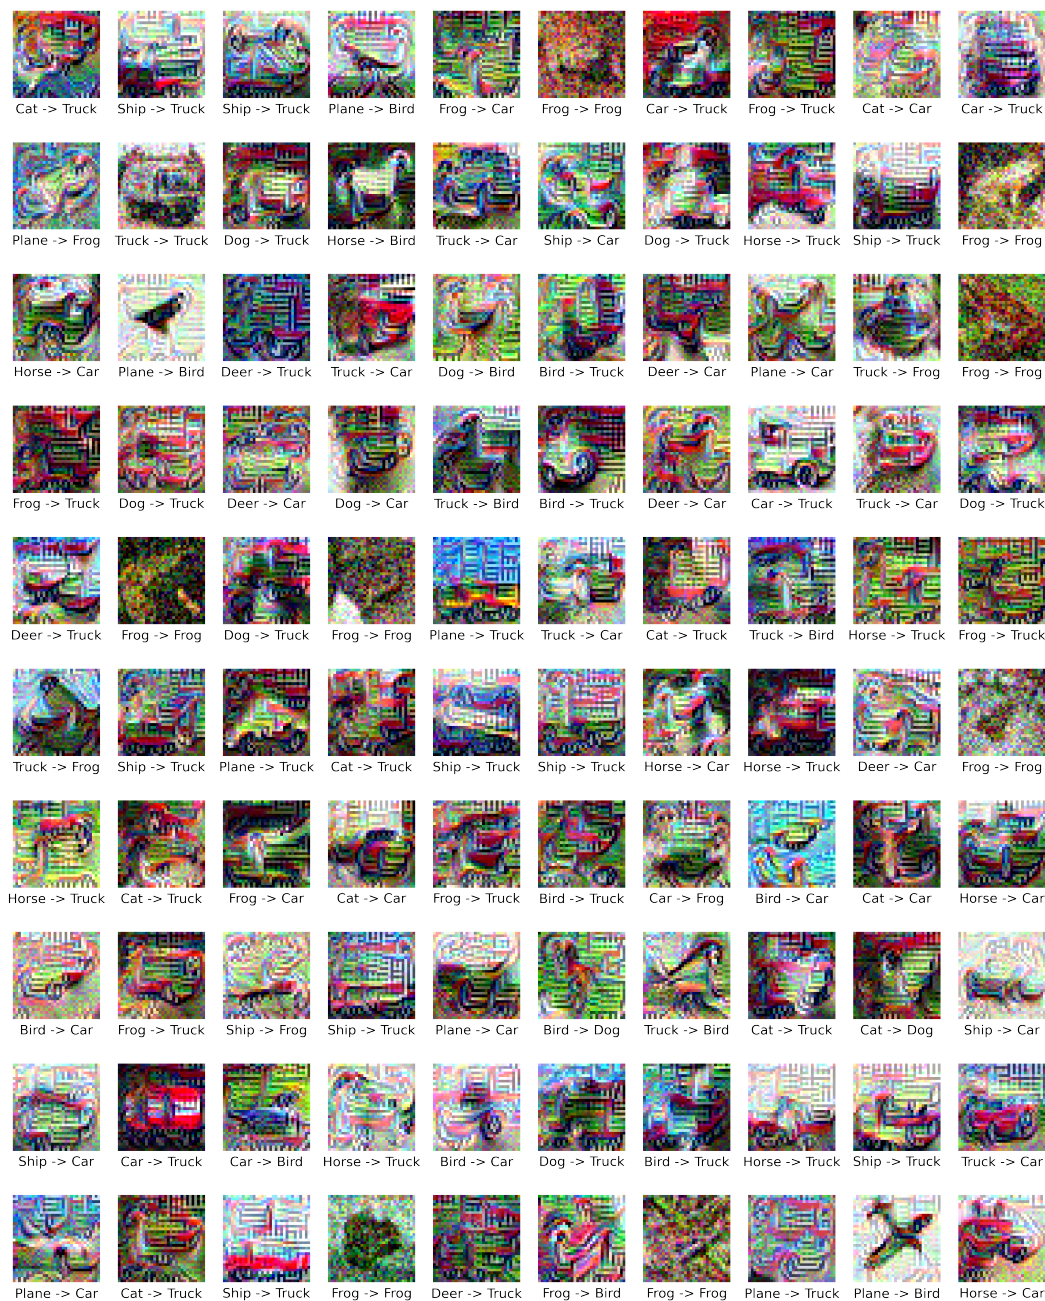

Figure 12: Adversarial examples generated by a network trained with benign training in stage 1 followed by benign centered training.

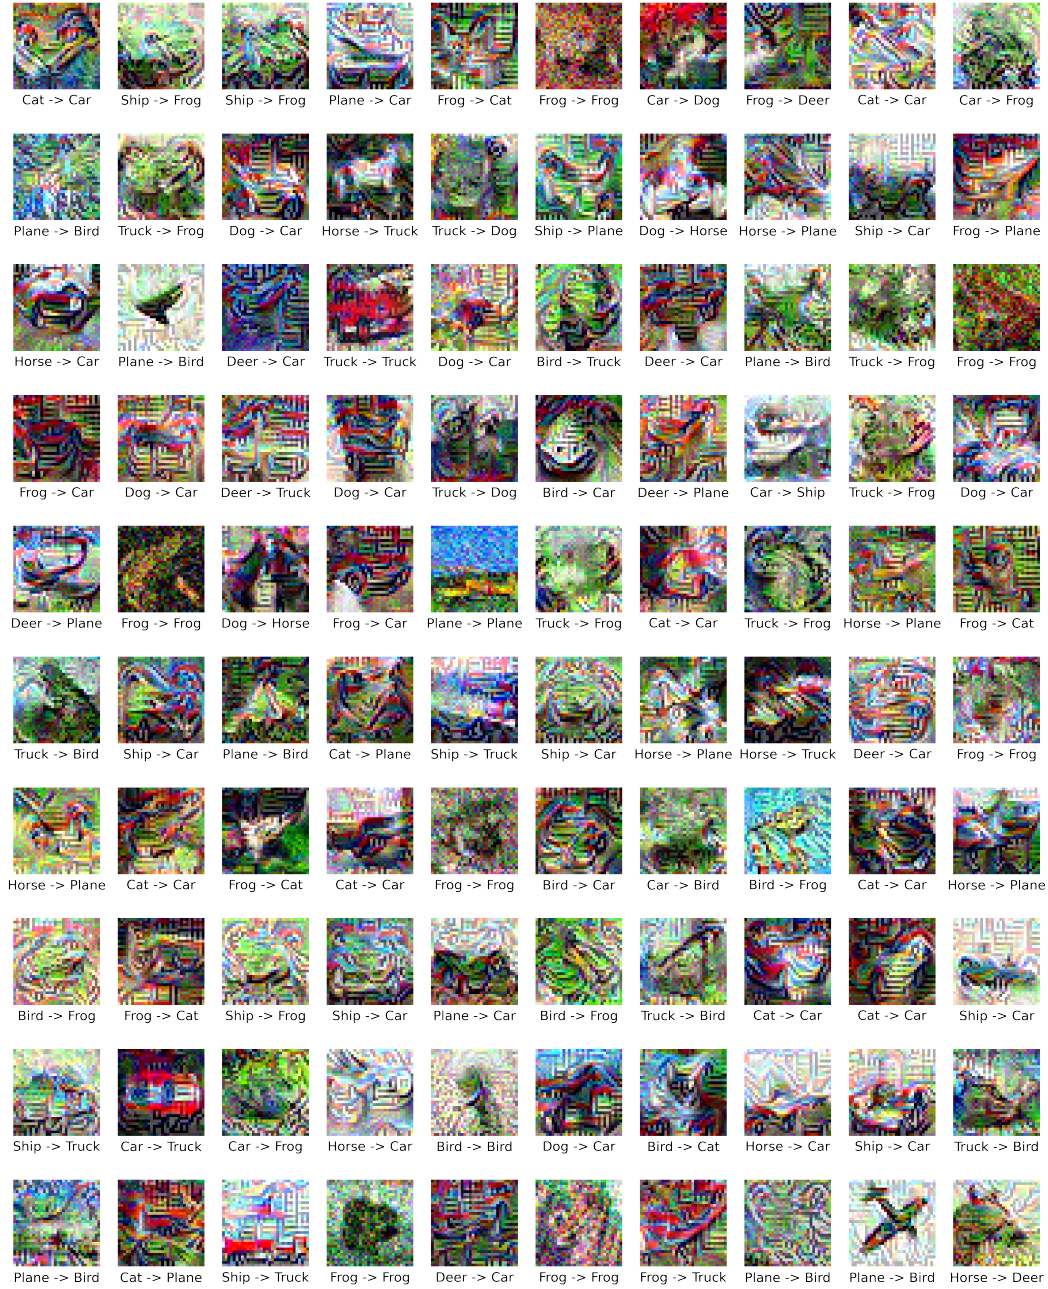

Figure 13: Adversarial examples generated by a network trained with benign training in stage 1 followed by adversarial centered training.

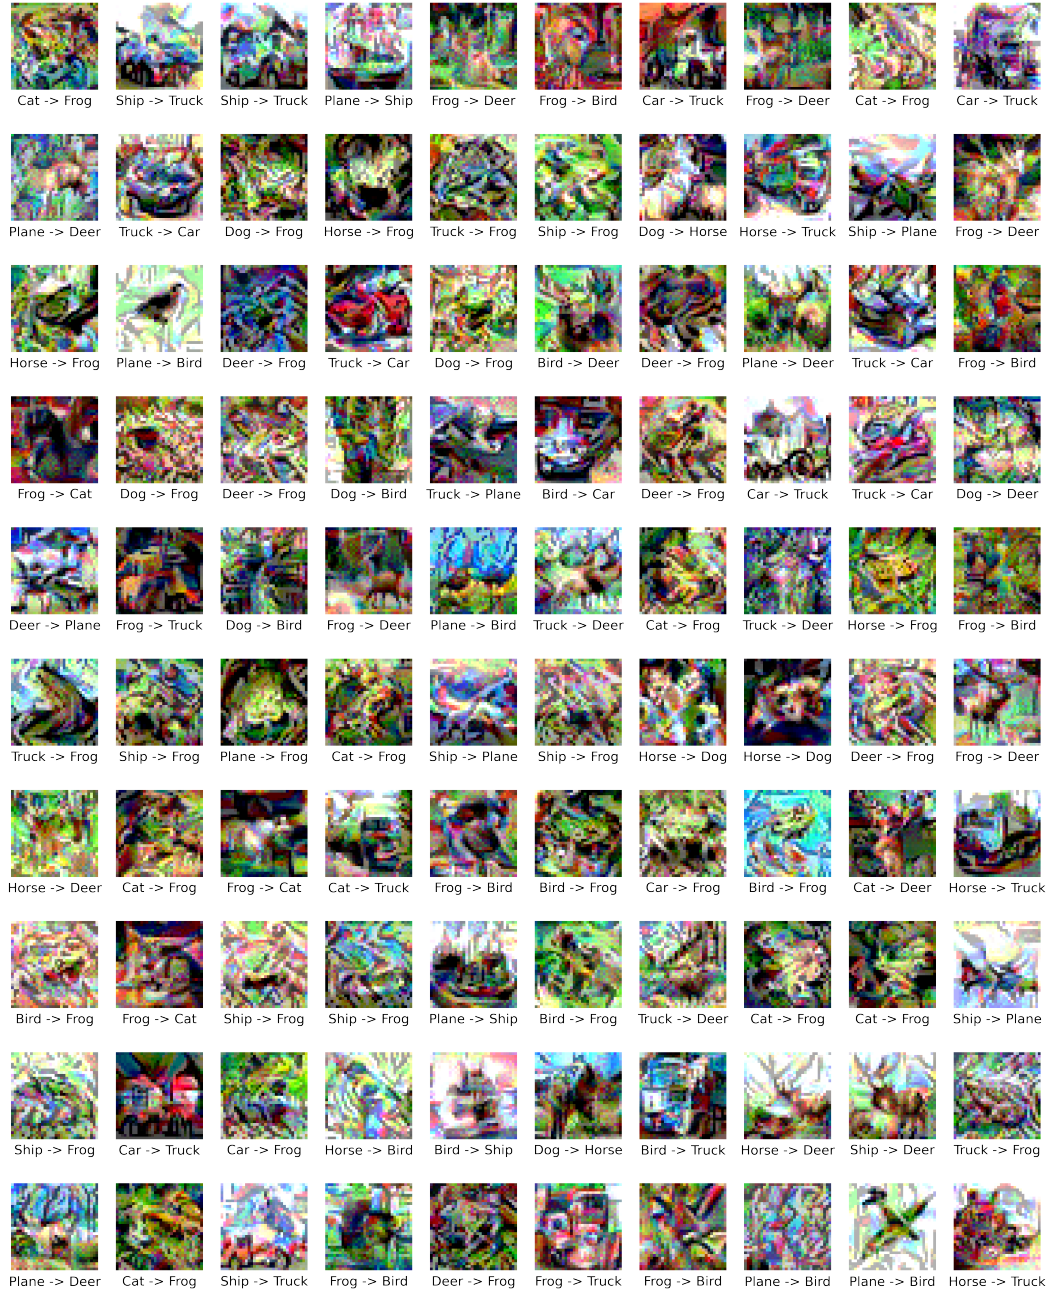

Figure 14: Adversarial examples generated by a network trained with adversarial training with standard dynamics.



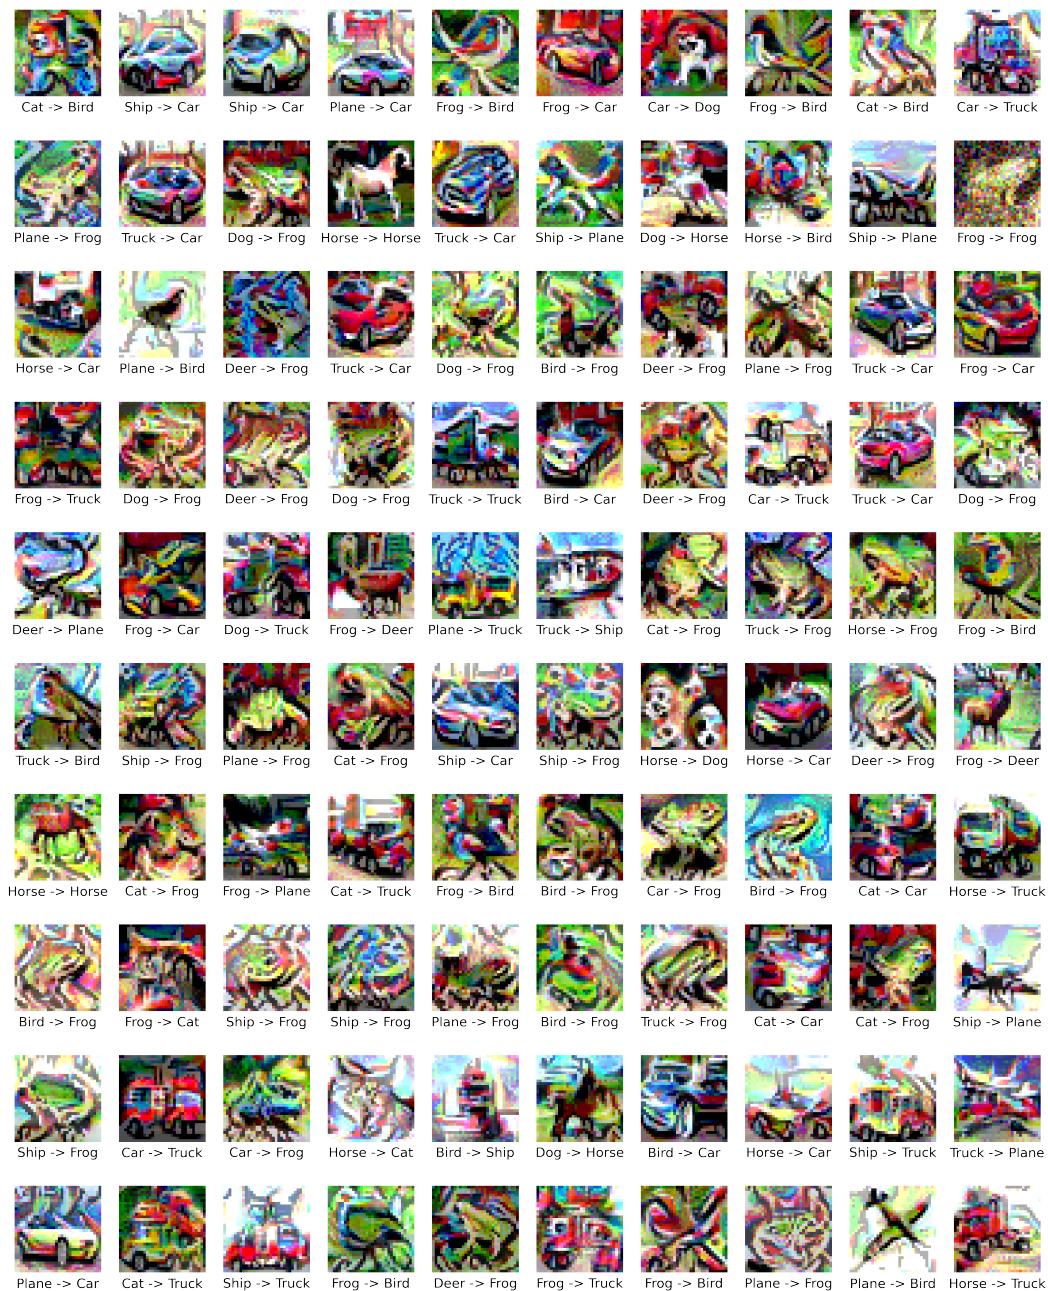

Figure 15: Adversarial examples generated by a network trained with adversarial training in stage 1 followed by benign centered training.



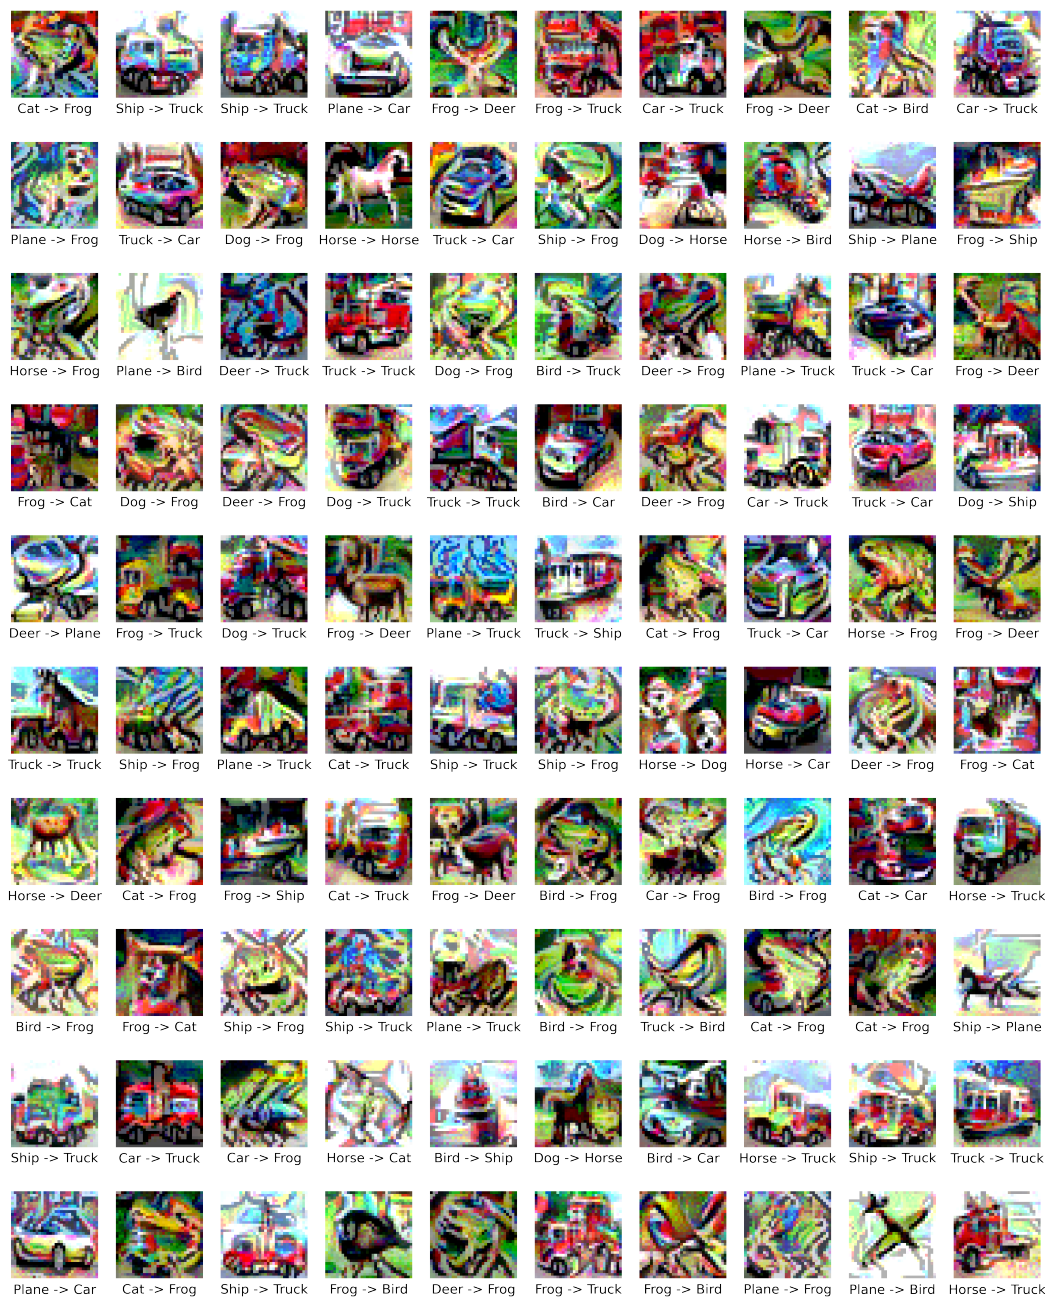

Figure 16: Adversarial examples generated by a network trained with adversarial training in stage 1 followed by adversarial centered training.
